# Supplementary material
Source: PubMed Central journal article supplement (PMC6159978)
Supplement: jci-128-90312-s071.pdf [file jci-128-90312-s071.pdf]

## Supplementary information

**Table S1.** Antibodies

| Antibody                          | Fluorochrome | Clone     | Supplier          | Catalogue  | Dilution |
|-----------------------------------|--------------|-----------|-------------------|------------|----------|
|                                   |              |           |                   | number     |          |
| CD5                               | Biotin       |           | Biolegend         | 100603     | 1:250    |
| CD49b                             | Biotin       |           | eBioscience       | 13-0491-85 | 1:250    |
| CD45R (B220)                      | Biotin       |           | Biolegend         | 103203     | 1:250    |
| CD117                             | Biotin       |           | Biolegend         | 105803     | 1:250    |
| F4/80                             | Biotin       |           | Biolegend         | 123105     | 1:250    |
| TER119                            | Biotin       |           | Biolegend         | 116204     | 1:250    |
| CD3                               | APC/Cy7      | 17A2      | Biolegend         | 100221     | 1:100    |
| CD19                              | PE           | 6D5       | Biolegend         | 115507     | 1:100    |
| CD18                              | PE           | M18/2     | Biolegend         | 101408     | 1:100    |
| CD29                              | APC          | HMB1-1    | Biolegend         | 303003     | 1:100    |
| CD45.2                            | PerCP/Cy5.5  | 104       | BD                | 552950     | 1:100    |
| Ly-4G/Ly-6C (Gr-1)                | Pacific Blue | RB6-8C5   | Biolegend         | 108430     | 1:100    |
| F4/80                             | PerCP/Cy5.5  | BM8       | Biolegend         | 123127     | 1:100    |
| F4/80                             | PE/Cy7       | BM8       | Biolegend         | 123113     | 1:100    |
| Rat IgG2a, $\kappa$ Isotype Ctrl  | PE           | RTK2758   | Biolegend         | 400508     | 1:100    |
| American Hamster IgG Isotype Ctrl | APC          | HTK888    | Biolegend         | 400912     | 1:100    |
| Sytox®Blue                        |              |           | Life Technologies | S34857     | 1:3000   |
| CD18 (LFA-1)                      | PerCP/Cy5.5  | H155-78   | Biolegend         | 141007     | 1:100    |
| Rat IgG1, $\kappa$ Isotype Ctrl   | PerCP/Cy5.5  | RTK2071   | Biolegend         | 400425     | 1:100    |
| VCAM1                             | PE           | M/K-2     | Invitrogen        | RMCD10604  | 1:40     |
| ICAM1                             | Alexa 488    | YN1/1.7.4 | Biolegend         | 116113     | 1:120    |
| CD11b                             | Alexa 488    | M1/70     | eBioscience       | 53-0112-82 | 1:80     |

**Table S2:** Clinical characteristics of JAK2-V617F-positive or CALR-positive CMN patients.

| UPN | Sex    | Age | Diagnosis | mutation     | JAK2-V617F allelic ratio |
|-----|--------|-----|-----------|--------------|--------------------------|
| P1  | male   | 51  | ET        | CALR (del52) |                          |
| P2  | female | 62  | ET        | CALR (del52) |                          |
| P3  | male   | 71  | ET        | CALR (ins5)  |                          |
| P4  | male   | 53  | PV        | JAK-V617F    | 47.5                     |
| P5  | female | 77  | ET        | JAK-V617F    | 27.1                     |
| P6  | male   | 66  | PV        | JAK-V617F    | 15.1                     |

UPN – Unique Patient Number      ET – Essential Thrombocythemia

PV – Polycythemia Vera

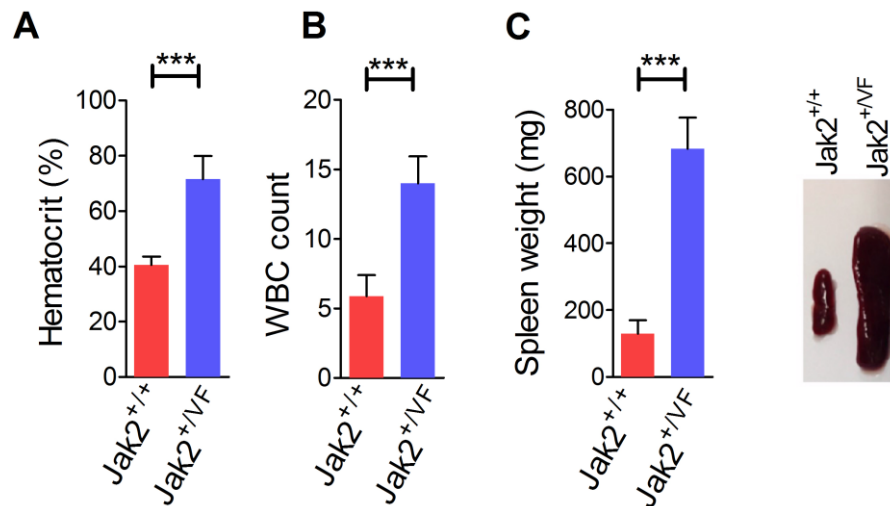

**Supplemental Figure 1: Characterization of  $JAK2^{+/NF}$  knock-in mice.** Measurement of haematocrit (A), white blood cell (WBC) count (x 1000/ $\mu$ L) (B) and spleen weight (C) of 10-12-week-old  $JAK2^{+/+}$  (n = 10) and  $JAK2^{+/NF}$  (n = 11) mice. A representative photograph of spleens from a  $JAK2^{+/+}$  and a  $JAK2^{+/NF}$  mouse are depicted in the right panel of (C). Data are shown as mean  $\pm$  SEM. \*\*\* $P \leq 0.001$  (unpaired, two-tailed Student's *t* test).

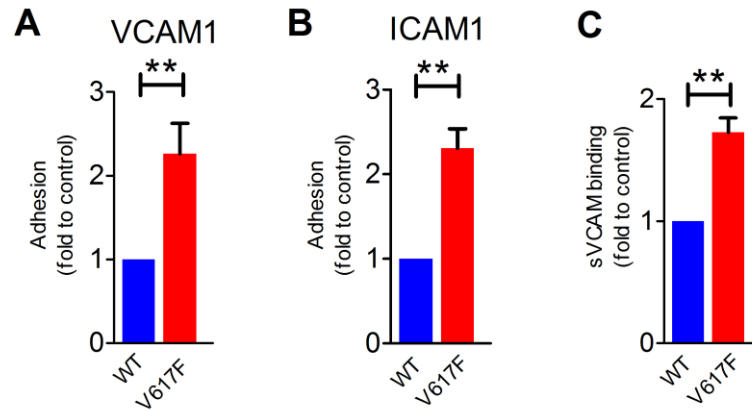

**Supplemental Figure 2: Static adhesion and soluble ligand binding in BaF3 JAK2-WT and BaF3 JAK2-V617F cells.** Static adhesion on Fc-free VCAM1 (A) and Fc-free ICAM1 (B) of BaF3 JAK2-WT (WT) and BaF3 JAK2-V617F (V617F) cells. (C) Soluble VCAM1 binding assay of BaF3 JAK2-WT and BaF3 JAK2-V617F cells. Data are shown as mean  $\pm$  SEM.  $**P \leq 0.01$  (unpaired, two-tailed Student's *t* test). Three independent experiments were performed each.

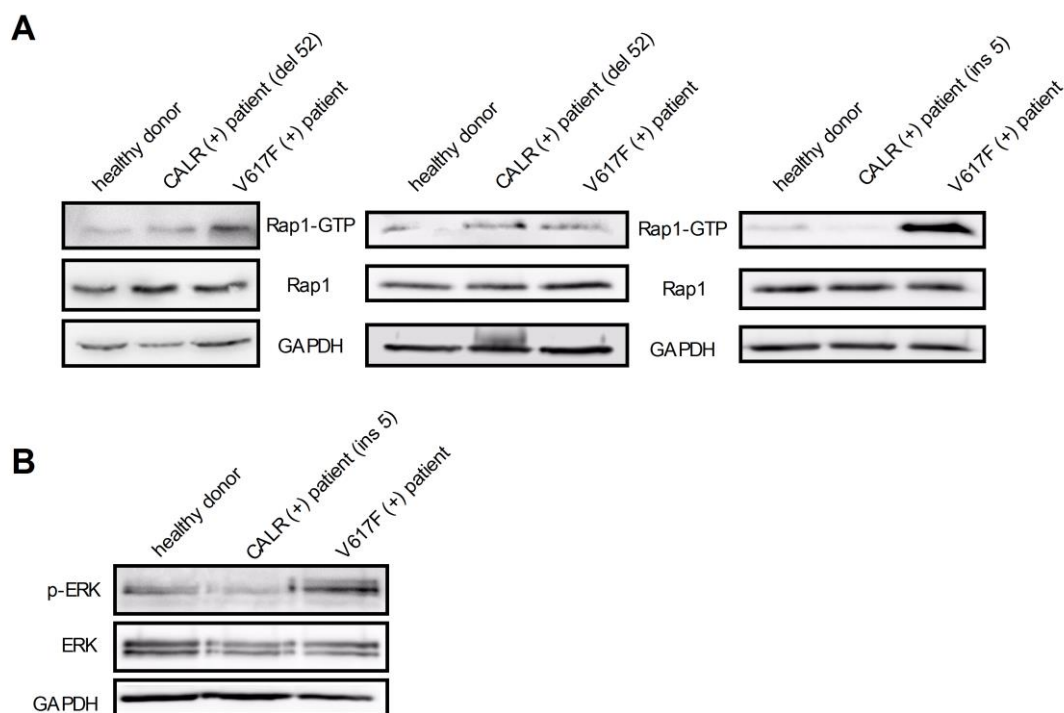

**Supplemental Figure 3: Rap1 activation and ERK signaling in granulocytes from CALR positive patients as compared to JAK2-V617F mutated patients.** (A) Rap1 is activated to a minor degree only in CALR positive human granulocytes. Western blot analysis of Rap1 activation of CALR positive patients (n = 3) compared to JAK2-V617F positive patients (n = 3) and healthy controls (n = 3). (B) Cellular lysates for additional signaling analysis were available in the CALR (ins5) mutated patient only. Depicted is Western blotting of ERK phosphorylation (phospho-p44/42 MAPK (Erk1/2) (Thr202/Tyr204)) in granulocytes of the CALR (ins5) mutated patient (n = 1) as compared to a JAK2-V617F positive patient (n = 1) and a healthy control (n = 1). No phospho-protein signals were detectable for STAT5, JAK2 and Akt.

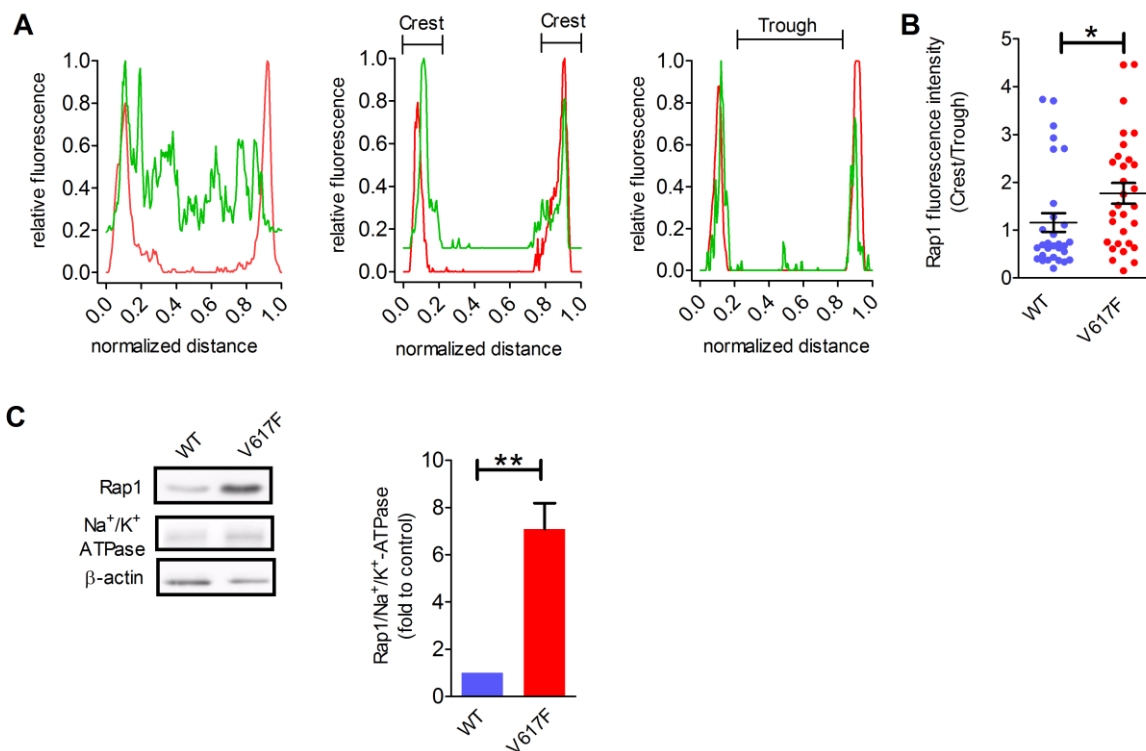

**Supplemental Figure 4: Rap1 translocation towards the plasma membrane.** (A) Line scan of Rap1 (green line) and actin (red line) fluorescence intensity in representative images from 32D JAK2-WT (left) and 32D JAK2-V617F (middle and right) cells. (B) Quantification of Rap1 fluorescence intensity following line-scan analysis. 30 random cells were analyzed from two independent experiments. Actin immunostaining was used to define the cell size, which in turn was determined by the length of the plotted line and was normalized between 0-1.0. The distance of 0-0.3 and 0.7-1.0 has been defined as “crest” and between 0.4-0.6 as “trough”. The signal intensity of Rap1 was expressed as the ratio of crest and trough. Data shown as mean  $\pm$  SEM. \* $P \leq 0.05$ , (unpaired, two-tailed Student’s  $t$  test). (C) Total membrane lysates obtained by subcellular fractionation of 32D JAK2-WT and 32D JAK2-V617F cells, respectively, were tested for Rap1.  $\text{Na}^+/\text{K}^+$  ATPase immunoblotting was used to control enrichment in plasma membranes.  $\beta$ -actin immunoblotting was used as control for equal loading (left panel). Quantification of Rap1 in total membrane fractions of 32D JAK2-WT and V617F cells (right panel). Data shown as mean  $\pm$  SEM. \*\* $P \leq 0.01$ , (unpaired, two-tailed Student’s  $t$  test). Three independent experiments were performed each.

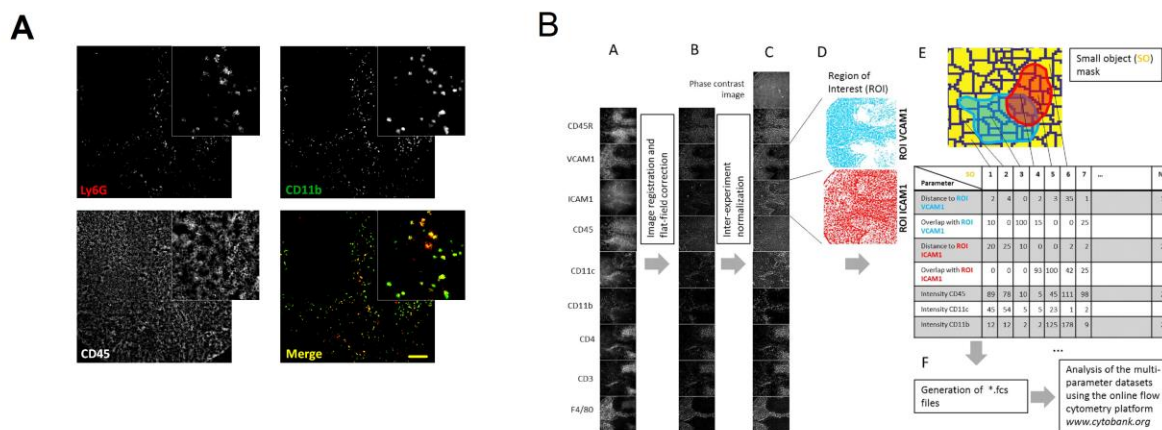

**Supplemental Figure 5: Multi-epitope ligand cartography (MELC) image processing and data analysis.** (A) Staining for CD11b and Ly6G. Merged image demonstrates that CD11b high positive cells (CD11b<sup>++</sup>) are Ly6G positive. Scale bar corresponds to 100  $\mu\text{m}$ ; insert shows a size of 200  $\mu\text{m}$ . (B) MELC image processing has been performed as described previously (51). Briefly, a series of raw fluorescence images acquired by the CCD camera of the MELC robot is shown (A). The corresponding phase contrast images (not all shown) were used to align all images of the series. Illumination fault due to the optics and the large CCD sensor were corrected using a flat-field image (selected from the series of post-bleach images). (B) The series of corrected fluorescence images from one single field of view is displayed. Fluorescent intensities had to be normalized due to variances during the sample preparation and variances in the staining efficiencies. (C) Fluorescence intensity images after inter-experiment normalization. (D) Regions of interest (ROI) are defined using an automated threshold based algorithm. (E) A mask of randomly distributed “small objects” (SO) of a size of 16 pixels is generated (yellow) of the given field of view. The minimal distances to the reference regions (e.g. VCAM1 in light blue or ICAM1 in red) or the pixel overlap can be determined for all SO. Arbitrary examples of these spatial data are shown in the first 4 rows of the table, whereas rows 5 to 7 show the mean fluorescent intensities of the markers for all SO. (F) Spatial data as well as the fluorescence data for all small objects were stored into FCS 3.0 data files, uploaded to the online multi-parameter flow cytometry data analysis platform [www.cytobank.org](http://www.cytobank.org).

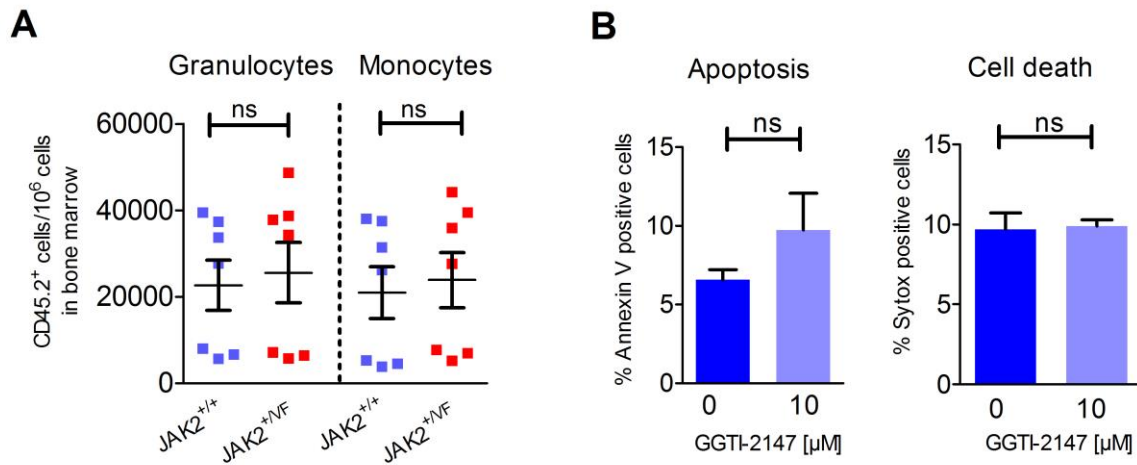

**Supplemental Figure 6: In vivo homing assay.** (A) Whole bone marrow (WBM) cells of 10-12-week-old JAK2<sup>+NF</sup> or JAK2<sup>+/+</sup> mice (carrying the congenic marker CD45.2) were injected into CD45.1 recipient mice. 16 h after injection bone marrow of recipient mice was evaluated. Data represents the number of detected CD45.2-positive granulocytes and monocytes per 10<sup>6</sup> cells in the bone marrow (n = 7/group). (B) Flow cytometric measurement of apoptosis (left panel) and cell death (right panel) 16 h after treatment of murine bone marrow cells with GGTI-2147 (10 μM, 30 min); (-) indicates DMSO control.
